# Supplementary material for: APLN, a novel prognostic biomarker, contributes to esophageal carcinoma development
Source: Research Square preprint supplement (doi:10.21203/rs.3.rs-7592740/v1), 2025-09-25
Supplement: Supplementary file 1 [file 917c9783d96806c7650af247.xlsx]

## Sheet: Sheet1
Age	gender	T	N	M	TNM	stage	status	survival time(month)
48	male	2	0	0	T2N0M0	2	0	67
49	male	2	1	0	T2N1M0	2	0	61
51	male	3	2	0	T3N2M0	3	1	4
55	male	2	0	0	T2N0M0	2	1	69
57	male	2	2	0	T2N2M0	3	1	32
57	male	3	2	0	T3N2M0	3	1	31
58	male	1	2	0	T1N2M0	3	1	21
59	male	1	2	0	T1N2M0	3	1	8
60	female	2	0	0	T2N0M0	2	0	118
60	male	2	1	0	T2N1M0	2	0	64
61	male	2	1	0	T2N1M0	2	0	47
61	male	1	0	0	T1N0M0	1	0	78
61	male	2	0	0	T2N0M0	2	0	71
61	male	2	0	0	T2N0M0	2	0	72
62	male	2	0	0	T2N0M0	2	0	69
63	male	1	0	0	T1N0M0	1	0	79
63	female	3	3	0	T3N3M0	4	1	17
63	male	2	0	0	T2N0M0	2	0	83
64	male	3	2	0	T3N2M0	3	1	32
64	male	3	3	0	T3N3M0	4	1	9
64	female	2	0	0	T2N0M0	2	0	73
65	female	3	3	0	T3N3M0	4	1	16
65	male	3	0	0	T3N0M0	2	1	60
65	female	3	3	0	T3N3M0	4	1	16
65	male	3	0	0	T3N0M0	2	0	81
65	female	3	2	0	T3N2M0	3	1	31
66	male	1	0	0	T1N0M0	1	0	58
66	female	1	0	0	T1N0M0	1	0	94
66	male	3	1	0	T3N1M0	3	1	16
66	male	3	0	0	T3N0M0	2	0	75
67	male	3	1	0	T3N1M0	3	1	13
67	male	3	0	0	T3N0M0	2	0	72
68	female	3	0	0	T3N0M0	2	0	77
68	male	3	1	0	T3N1M0	3	1	16
68	male	3	0	0	T3N0M0	2	1	12
68	male	3	1	0	T3N1M0	3	1	13
68	male	2	1	0	T2N1M0	2	0	79
69	male	2	0	0	T2N0M0	2	1	36
69	male	3	1	0	T3N1M0	3	1	14
69	male	3	1	0	T3N1M0	3	1	33
70	male	3	1	0	T3N1M0	3	1	18
71	male	3	1	0	T3N1M0	3	1	55
71	female	3	0	0	T3N0M0	2	0	75
71	male	3	0	0	T3N0M0	2	0	64
72	female	2	1	0	T2N1M0	2	1	65
72	male	3	0	0	T3N0M0	2	1	45
72	female	3	2	0	T3N2M0	3	1	6
72	male	2	2	0	T2N2M0	3	1	20
72	male	2	2	0	T2N2M0	3	1	19
73	male	3	1	0	T3N1M0	3	1	9
74	male	3	0	0	T3N0M0	2	1	48
74	male	3	1	0	T3N1M0	3	1	30
74	male	2	0	0	T2N0M0	2	0	66
75	male	1	1	0	T1N1M0	1	0	63
75	male	3	0	0	T3N0M0	2	0	74
76	male	2	0	0	T2N0M0	2	1	53
76	male	3	0	0	T3N0M0	2	0	67
77	male	3	0	0	T3N0M0	2	0	71
78	male	2	2	0	T2N2M0	3	1	21
81	male	3	1	0	T3N1M0	3	1	22
