# Supplementary material for: APLN, a novel prognostic biomarker, contributes to esophageal carcinoma development
Source: Research Square preprint supplement (doi:10.21203/rs.3.rs-7592740/v1), 2025-09-25
Supplement: Supplementary file 2 [file adcc789324c8ba52e3cfd25d.xlsx]

## Sheet:  Table S1
CRISPR-Cas9 screening data
Gene Symbol	log2(GeCKOv2/Input)	pValue(GeCKOv2/Input)
CD99_X	-1.91887	0.0034526
CAPN11	-2.36964	0.004958
ZNF585A	-2.3767	0.00450395
OXLD1	-2.40637	0.00429138
MXRA5	-2.46407	0.00468835
CHRNA10	-2.47878	0.00418855
KCNJ6	-2.48192	0.00450395
IL17RA	-2.52259	0.0045403
POLR2A	-2.54148	0.00450395
KIAA1715	-2.54325	0.0045403
ERN2	-2.55016	0.00422258
C14orf183	-2.55124	0.00418855
DPCD	-2.56418	0.00468835
ALAD	-2.565	0.00450395
C2CD4D	-2.61973	0.00450395
PPM1K	-2.64564	0.00314373
LCN1	-2.64662	0.00484076
RNF185	-2.65445	0.00395726
FMOD	-2.65568	0.00350029
RASAL1	-2.65735	0.00405492
PITX1	-2.65817	0.00499765
FCRLB	-2.66754	0.00468835
RESP18	-2.71093	0.00322294
FBF1	-2.71139	0.00446787
FSTL5	-2.72224	0.00398957
CDPF1	-2.73654	0.00386174
NCS1	-2.74749	0.00395726
LIPT2	-2.75523	0.00443206
RND1	-2.75588	0.00450395
LOC650293	-2.76277	0.00395726
FAM221B	-2.76777	0.00402213
DCAF12L1	-2.7883	0.00499765
CNGA3	-2.78985	0.00450395
RNASE4	-2.79734	0.00364697
NFKBIE	-2.80203	0.00450395
SCARF2	-2.80299	0.00472604
BCAM	-2.80682	0.00499765
SLC27A3	-2.81864	0.004764
CD3E	-2.8227	0.00405492
ZNF700	-2.82368	0.00398957
MRPS15	-2.83146	0.00468835
ZIC2	-2.83487	0.0043965
RNASEH2C	-2.83593	0.00367697
CLEC17A	-2.83845	0.00468835
PLAC1	-2.84052	0.00432616
OSGEPL1	-2.84343	0.00450395
WNT9A	-2.84661	0.00398957
UVSSA	-2.84726	0.00367697
ZNFX1	-2.85618	0.00450395
TFPI2	-2.85802	0.00422258
SPDYC	-2.86187	0.00450395
DCD	-2.86926	0.003359
OR7G3	-2.87042	0.00472604
CPVL	-2.87338	0.00402213
FAM109B	-2.87956	0.00275053
CCL16	-2.88785	0.00484076
GRHL2	-2.88823	0.00398957
ZBTB12	-2.89619	0.00450395
ZP3	-2.89993	0.00350029
ING2	-2.90159	0.004764
C2orf68	-2.90417	0.00491864
CRB2	-2.91369	0.00350029
GRXCR1	-2.91426	0.00425685
EDN3	-2.91444	0.00468835
DHX37	-2.9145	0.00330396
PIDD	-2.91545	0.00350029
ATP6V1G3	-2.92216	0.00484076
CCDC109B	-2.92812	0.00322294
DPP9	-2.92848	0.0025713
CST3	-2.93186	0.00316993
CCHCR1	-2.93464	0.00429138
ZNF366	-2.93597	0.00450395
NRN1L	-2.94135	0.0037072
ODF3B	-2.94271	0.00450395
CGGBP1	-2.94668	0.00379923
RTKN2	-2.94957	0.00499765
LRRC20	-2.95094	0.00316993
HPDL	-2.95309	0.00352919
AASDHPPT	-2.95637	0.00491864
RPUSD4	-2.95819	0.00418855
BCL3	-2.96103	0.00499765
CHMP6	-2.96717	0.0045403
GJB1	-2.96791	0.00330396
OPRM1	-2.96905	0.00358764
PLEKHG5	-2.97056	0.0034716
LIG4	-2.97152	0.00422258
C6orf48	-2.97154	0.00499765
SPRR1A	-2.97289	0.00275053
CD2	-2.97533	0.00468835
ROBO1	-2.97874	0.00450395
KDM3B	-2.97924	0.004958
C1orf227	-2.98001	0.0034716
SH3D19	-2.986	0.00487956
STARD5	-2.98656	0.00316993
RPL26L1	-2.99123	0.00299063
CAPN9	-2.99812	0.00299063
SPAG5	-2.99909	0.00493173
PRUNE2	-2.99965	0.00402213
GLOD5	-3.00121	0.00425685
KHDC1L	-3.00551	0.0045403
VASN	-3.00556	0.00135389
TMEM132D	-3.00563	0.00491864
OR5T3	-3.01272	0.00450395
NEURL	-3.01572	0.00499765
SERPINA6	-3.01887	0.00316993
DDX52	-3.02031	0.00499765
CD1B	-3.0211	0.00350029
VANGL1	-3.02159	0.00395726
RSAD2	-3.02181	0.00367697
FAM43B	-3.0245	0.00330396
ENPP7	-3.02691	0.00432616
TARM1	-3.02863	0.00272752
TELO2	-3.02904	0.00322294
NOX1	-3.02951	0.00386174
SSFA2	-3.0364	0.00465093
PHKB	-3.03845	0.00299063
SDE2	-3.03871	0.00316993
GRM6	-3.04055	0.0045403
USP49	-3.04209	0.00450395
C2CD4C	-3.04383	0.00450395
PRDX4	-3.04522	0.00286828
TMEM45B	-3.04525	0.00415477
ZNF614	-3.04671	0.00379923
JHDM1D	-3.04797	0.00301566
TRIM65	-3.05179	0.00330396
SLC30A10	-3.05233	0.0037072
OR2T12	-3.05423	0.00279709
DERL3	-3.05677	0.00373765
ATG4B	-3.0616	0.00487956
CENPK	-3.06289	0.00450395
MPHOSPH10	-3.065	0.00450395
CELF6	-3.06732	0.00254967
LRRC6	-3.07172	0.00402213
MSANTD2	-3.07326	0.00379923
FAM71E1	-3.07353	0.0045403
FPGS	-3.07539	0.0035583
APMAP	-3.0775	0.00324974
KCTD20	-3.07845	0.0034716
TREM2	-3.08119	0.00402213
PSMB10	-3.08216	0.00316993
TCN2	-3.08527	0.00379923
NCOA2	-3.08701	0.0035583
DUSP28	-3.08918	0.00330396
SECISBP2	-3.08982	0.00412124
FTHL17	-3.08991	0.00358764
HSD11B1L	-3.09117	0.00450395
IL17F	-3.09139	0.00333138
KCNQ4	-3.09395	0.00468835
SGSH	-3.09508	0.00352919
DEDD	-3.09728	0.00386174
TEX12	-3.1029	0.0043965
LRP12	-3.1035	0.00322294
S100A11	-3.10848	0.00386174
MYCBPAP	-3.10972	0.00316993
PGRMC1	-3.11272	0.00402213
CYS1	-3.11548	0.00299063
MOSPD1	-3.11556	0.00314373
HIP1R	-3.11727	0.00333138
CCNA2	-3.12155	0.00446787
OSR2	-3.12389	0.00405492
MYCBP	-3.12426	0.00450395
LRRC27	-3.12469	0.00429138
FSBP	-3.12669	0.00499765
MED18	-3.12947	0.00450395
AGAP1	-3.12957	0.00402213
C8orf82	-3.13007	0.00432616
CDX4	-3.13171	0.00338683
NKX3-2	-3.13171	0.00333138
NRTN	-3.13426	0.00226379
DNAJC21	-3.13597	0.00215053
GALNT9	-3.13716	0.00405492
ABT1	-3.1373	0.0035583
APOBEC3C	-3.14033	0.00457691
USO1	-3.1419	0.00330396
IGSF11	-3.14632	0.00330396
TP53I3	-3.14676	0.00199037
DNAJB14	-3.14733	0.00412124
SDF4	-3.14819	0.00311773
PCBP3	-3.14988	0.00294113
ZNF330	-3.15091	0.00425685
TBC1D22A	-3.15139	0.00330396
MED16	-3.15213	0.00392518
ST6GALNAC1	-3.15272	0.00379923
PDGFRA	-3.15326	0.00457691
MAFG	-3.16024	0.00275053
TMEM129	-3.17023	0.00319633
MACROD1	-3.1706	0.00379923
EMD	-3.17392	0.00402213
TCEAL8	-3.17441	0.00367697
PES1	-3.17974	0.00386174
ASF1B	-3.18219	0.00330396
KLK4	-3.18264	0.00398957
MEX3A	-3.18272	0.00301566
SHISA9	-3.184	0.00350029
NKIRAS2	-3.18604	0.00450395
HIST1H1T	-3.19005	0.00379923
ARPC1A	-3.19364	0.00350029
TIMP3	-3.19552	0.00432616
PLCXD1_X	-3.19629	0.00379923
SYVN1	-3.19787	0.00322294
DNAJC22	-3.20039	0.00367697
CREG1	-3.20294	0.00316993
TP53INP2	-3.20336	0.00412124
BCAR3	-3.20545	0.00379923
NTSR1	-3.2062	0.00379923
DOK1	-3.20911	0.004958
TMEM204	-3.20913	0.00484076
C1orf65	-3.20914	0.00499765
FBXL2	-3.21003	0.00395726
NTRK3	-3.21008	0.00352919
NES	-3.21076	0.00484076
OR5I1	-3.21321	0.00398957
PQLC1	-3.21488	0.00350029
GABRA3	-3.21922	0.0023825
TTF2	-3.21953	0.00450395
GPR132	-3.21976	0.00338683
GRK5	-3.22004	0.00487956
FAM107A	-3.22421	0.00232245
CCDC85C	-3.22436	0.00408796
FGFR4	-3.22445	0.00484076
TRIP6	-3.2256	0.00373765
CLEC12B	-3.23061	0.00465093
EXOC3L2	-3.23113	0.0045403
RER1	-3.23223	0.0045403
GLYATL3	-3.23339	0.00296579
MSI1	-3.23631	0.00450395
AMIGO3	-3.2371	0.00472604
TMEM35	-3.23834	0.00487956
NLRP10	-3.24033	0.0034716
LRFN5	-3.24053	0.00294113
FUT6	-3.24129	0.00176292
LYPLA2	-3.24277	0.00213217
THOC5	-3.24317	0.0023825
C1orf158	-3.2463	0.00333138
KIAA1841	-3.24782	0.00324974
ASB11	-3.24902	0.0025282
EPN1	-3.25049	0.00316993
C13orf45	-3.2512	0.00402213
IFIT1B	-3.25146	0.00294113
UCN	-3.25333	0.00338683
PGPEP1L	-3.25628	0.00491864
C1QTNF3	-3.25709	0.00422258
MXD3	-3.2579	0.00322294
BNIPL	-3.25829	0.00379923
KDELC2	-3.2583	0.00338683
NECAB2	-3.26173	0.00465093
RASAL2	-3.26219	0.00299063
SYNE3	-3.26306	0.00412124
PSMC6	-3.26621	0.00358764
IRF9	-3.26817	0.00379923
NPAS4	-3.26854	0.00301566
HMOX1	-3.26915	0.00418855
C16orf45	-3.27048	0.00209587
H2BFWT	-3.27113	0.00286828
DDX55	-3.2734	0.00386174
SLC25A10	-3.27631	0.00282064
LEPROTL1	-3.27785	0.00254967
RBFA	-3.28129	0.00195631
FGF20	-3.28222	0.00367697
OR13D1	-3.28358	0.00379923
RFNG	-3.28378	0.00450395
TGM7	-3.28461	0.00432616
CPD	-3.28468	0.00322294
RNMT	-3.28517	0.00272752
ZFYVE28	-3.2858	0.00367697
MEGF8	-3.28642	0.00330396
RHOH	-3.28714	0.00333138
UNC79	-3.28743	0.00316993
PARM1	-3.28843	0.00425685
SLC37A2	-3.28915	0.00333138
SCNN1A	-3.29238	0.00206015
FCGR2B	-3.29544	0.00367697
ERVFRD-1	-3.29569	0.00275053
OR4F6	-3.29574	0.00379923
OAS1	-3.29874	0.00306631
EVC	-3.3001	0.00432616
AHRR	-3.3015	0.00272752
CHRM4	-3.30363	0.003359
OR5H2	-3.30402	0.00322294
TFR2	-3.30418	0.00301566
IRF1	-3.3051	0.00299063
PPP1R14B	-3.30783	0.0017174
CD79A	-3.31206	0.00402213
AR	-3.3124	0.00402213
TBC1D10C	-3.31584	0.0037072
GCKR	-3.31621	0.00402213
LCN10	-3.3188	0.00316993
KIDINS220	-3.32138	0.00418855
KRT71	-3.32152	0.00279709
OSGIN1	-3.32382	0.00395726
TJP1	-3.3246	0.00330396
SPINK4	-3.32543	0.00450395
STX16	-3.32545	0.00373765
CCDC137	-3.32546	0.00465093
CMTM2	-3.3271	0.00358764
KPNA5	-3.32744	0.00330396
TGFBR2	-3.3312	0.00168766
TUBB1	-3.33211	0.00311773
RAB31	-3.33371	0.00402213
PHF13	-3.33503	0.00465093
KCND3	-3.33513	0.00184125
SLC35G3	-3.33515	0.00379923
SUV39H2	-3.33645	0.00422258
FAM179A	-3.33745	0.00450395
DCAF6	-3.33755	0.00322294
NT5C3B	-3.33864	0.00358764
PRSS3	-3.34162	0.00350029
ZNF383	-3.34246	0.00341488
GFI1B	-3.34538	0.00450395
SH3RF2	-3.3459	0.00468835
CD74	-3.34818	0.00199037
WDR1	-3.34872	0.00358764
SPATA5L1	-3.34989	0.00324974
SPRYD4	-3.34989	0.00412124
PCSK7	-3.35209	0.00379923
TARBP2	-3.35306	0.00299063
PLA2G15	-3.35324	0.00450395
GEMIN4	-3.35333	0.00446787
ALPP	-3.35527	0.00322294
HLA-DMA	-3.35683	0.00379923
AADACL2	-3.35737	0.0025282
TRPM4	-3.35862	0.00301566
ELMSAN1	-3.36121	0.00213217
ECSIT	-3.36144	0.00301566
ENC1	-3.36276	0.00402213
ARHGEF17	-3.3639	0.00450395
JAZF1	-3.36406	0.00358764
SOX1	-3.36712	0.00333138
COPS2	-3.36726	0.00309192
GJB4	-3.36997	0.00450395
ACO2	-3.37564	0.00358764
SCARF1	-3.37706	0.00443206
UBE2O	-3.37934	0.00392518
ULBP2	-3.38074	0.00316993
MSL2	-3.38469	0.00392518
NR2C2AP	-3.38541	0.00392518
CYP4F12	-3.39153	0.00358764
MAP6	-3.39154	0.00484076
OSBPL7	-3.39226	0.00450395
DST	-3.39328	0.00352919
UPP1	-3.39431	0.00429138
GPR126	-3.39434	0.00412124
ZNF259	-3.39444	0.00316993
SNX31	-3.3945	0.00333138
IFT80	-3.39513	0.00344313
FAM19A4	-3.39564	0.00408796
CNP	-3.39578	0.00215053
PPP2CA	-3.39713	0.00412124
LLGL1	-3.39943	0.00206015
PCP2	-3.39966	0.00379923
FIBIN	-3.39972	0.00499765
TCEAL1	-3.40028	0.00386174
ECHS1	-3.40123	0.00314373
GPSM3	-3.40298	0.0037072
NXPE3	-3.40455	0.00398957
HDAC1	-3.40512	0.0045403
NACC1	-3.40757	0.00465093
PAM16	-3.41069	0.00330396
MARCKS	-3.41239	0.00379923
SLC4A10	-3.41334	0.00330396
SSC5D	-3.4148	0.00344313
C17orf98	-3.41781	0.00450395
LINGO4	-3.4179	0.00275053
LCE3D	-3.41835	0.00484076
SASH3	-3.41958	0.00299063
MMP9	-3.42207	0.00344313
TMPRSS15	-3.42227	0.00450395
LNPEP	-3.42425	0.003359
CNOT2	-3.4249	0.00316993
WDFY4	-3.42545	0.00465093
CDIPT	-3.4262	0.00484076
CHAC2	-3.42759	0.00450395
ZNF138	-3.42874	0.00379923
CHAF1B	-3.42879	0.00309192
TRIM31	-3.42904	0.00386174
NEK2	-3.42917	0.00465093
PHF20	-3.4295	0.0034716
SRSF12	-3.43002	0.00379923
CBX4	-3.43034	0.00450395
ACSM3	-3.4307	0.00350029
PCDH11X	-3.43173	0.00364697
BRICD5	-3.43194	0.00358764
C17orf53	-3.43219	0.00450395
UTS2B	-3.4327	0.00450395
TPTE2	-3.43296	0.00306631
GLRA1	-3.43461	0.00311773
WDTC1	-3.43611	0.00294113
ZNF775	-3.43829	0.00450395
FAM203A	-3.43841	0.00275053
NUP43	-3.43879	0.00484076
RCAN1	-3.4406	0.00187347
EXOSC9	-3.44173	0.00338683
RSPH9	-3.44349	0.00450395
SNF8	-3.44663	0.004958
SEMA3F	-3.44731	0.00322294
IGF2BP2	-3.44763	0.00265954
ATF7IP	-3.45062	0.00324974
SP8	-3.45359	0.00197327
RRS1	-3.45587	0.00484076
IL21R	-3.45733	0.00352919
ZSCAN25	-3.45812	0.00352919
FAM13B	-3.45875	0.00450395
CRTC3	-3.45972	0.00379923
ITPKA	-3.45991	0.00199037
AIM1	-3.45998	0.00311773
GLT1D1	-3.46097	0.00338683
KREMEN1	-3.46103	0.00154597
FLOT1	-3.46283	0.00309192
GFRA3	-3.46305	0.00499765
C6orf57	-3.46344	0.00373765
TFEB	-3.46515	0.00465093
FGD5	-3.46949	0.00379923
METTL7B	-3.47027	0.004764
ADAMTS5	-3.47039	0.00379923
ZNF830	-3.47109	0.00484076
PYCARD	-3.47198	0.00294113
GPS1	-3.47202	0.00333138
PSPC1	-3.47247	0.00333138
TTI2	-3.47417	0.00301566
HOXB6	-3.47433	0.00418855
DNASE1	-3.47444	0.00299063
TMC4	-3.47693	0.00215053
SPRYD3	-3.47814	0.00301566
CAP1	-3.47924	0.00386174
PFN3	-3.47993	0.00472604
BEAN1	-3.48047	0.00193947
EXTL3	-3.48134	0.00200761
FRAT1	-3.48249	0.0034716
AMN1	-3.48299	0.00314373
CCNO	-3.48386	0.00344313
GDF5	-3.48508	0.00418855
C9orf163	-3.48588	0.0045403
CHN1	-3.48625	0.00379923
ATG7	-3.48665	0.00220649
GYS1	-3.48737	0.00301566
HDHD3	-3.48832	0.00216904
KRT31	-3.49033	0.00301566
OR6C6	-3.49126	0.00499765
OR4D9	-3.49238	0.003359
C16orf59	-3.49334	0.00197327
PCDHB1	-3.49449	0.00234231
DFFB	-3.49586	0.00316993
CYP4F3	-3.49664	0.0034716
POLR1E	-3.49678	0.00484076
C2orf76	-3.49723	0.00311773
ARL15	-3.49854	0.00265954
TAAR8	-3.49902	0.00333138
MGAT5B	-3.4992	0.00405492
MEGF6	-3.50077	0.00484076
TMED4	-3.50192	0.00324974
RPS6KL1	-3.50227	0.0025713
NXPE1	-3.50279	0.00244398
HDDC2	-3.50377	0.00465093
TP53TG5	-3.50436	0.00322294
COX5A	-3.50457	0.00379923
CTNNA3	-3.5078	0.00206015
COG1	-3.50838	0.00367697
NOL8	-3.50932	0.0045403
PLCD4	-3.50948	0.00367697
PPME1	-3.51098	0.00405492
OVOL1	-3.51116	0.00412124
VTI1B	-3.51116	0.00491864
GPR123	-3.51253	0.00379923
CD163	-3.51382	0.00499765
CNOT4	-3.51409	0.00405492
CCNF	-3.51526	0.00450395
TALDO1	-3.51749	0.00279709
NADSYN1	-3.51783	0.00350029
CHEK1	-3.51847	0.00301566
SKA1	-3.51942	0.00412124
ATP1B2	-3.52003	0.00220649
C21orf33	-3.5203	0.00107233
SUPT20HL1	-3.52035	0.00309192
ENGASE	-3.52151	0.00379923
AGPAT1	-3.52213	0.00379923
ABP1	-3.52241	0.00129494
KCNQ2	-3.5234	0.00364697
ITGB2	-3.52472	0.00402213
GJB5	-3.52591	0.00200761
PTGDR	-3.52612	0.00491864
SNX4	-3.52644	0.00383037
CEP85	-3.5265	0.00344313
TP53BP1	-3.52727	0.00379923
C9orf24	-3.52728	0.00418855
NPHS1	-3.5273	0.00373765
ZMYND19	-3.52821	0.00270469
OR10G3	-3.52952	0.00322294
ECE1	-3.53101	0.0034716
CYYR1	-3.53113	0.00184125
POU3F2	-3.53234	0.00275053
PCDHB9	-3.53383	0.00450395
DEF6	-3.53484	0.00294113
C1QL4	-3.53539	0.00197327
ST6GALNAC6	-3.53545	0.00118408
PARP3	-3.5379	0.00299063
TMEM79	-3.53855	0.00491864
SRRM2	-3.53913	0.00322294
TOMM22	-3.53918	0.00330396
SLC27A6	-3.54068	0.00330396
ANXA6	-3.54109	0.00432616
NENF	-3.54112	0.00373765
IFNA2	-3.54172	0.0034716
AKT1S1	-3.54184	0.00450395
TRIM68	-3.54341	0.00367697
SAMD1	-3.54604	0.00429138
NECAP2	-3.54615	0.00190621
MRPL32	-3.54665	0.00316993
C7orf26	-3.54719	0.00364697
SLC22A13	-3.54799	0.0034716
ARHGAP26	-3.54805	0.00450395
ZNF624	-3.54987	0.00468835
SGK2	-3.5519	0.00234231
ADM	-3.55567	0.00193947
HOXD1	-3.55712	0.00468835
AGPAT4	-3.55733	0.00450395
MDC1	-3.56017	0.00167297
USH2A	-3.5618	0.00367697
IKZF2	-3.56197	0.00450395
ANXA3	-3.56202	0.00301566
KIAA1430	-3.56254	0.00242332
KIAA0907	-3.56266	0.00319633
KLC1	-3.56319	0.00289238
RMND5B	-3.56477	0.00418855
STAG2	-3.56561	0.00358764
SELO	-3.56587	0.00289238
ADRB2	-3.56716	0.00182533
CSPG4	-3.56745	0.00327675
PVRIG	-3.56747	0.00192278
C3orf67	-3.56747	0.00499765
YOD1	-3.56759	0.00429138
FAS	-3.56787	0.00311773
DPPA3	-3.56803	0.00301566
TCP11L1	-3.56843	0.00450395
VAV3	-3.56856	0.0043965
C12orf65	-3.57076	0.00330396
TMEM51	-3.57604	0.00418855
POU6F1	-3.57798	0.00465093
ENDOG	-3.57891	0.00184125
PKDREJ	-3.58477	0.00153242
CHRNA2	-3.58517	0.00461378
CCNL2	-3.58596	0.00405492
CPAMD8	-3.58645	0.00330396
FAM162A	-3.58708	0.00468835
GORASP2	-3.58893	0.00484076
ANGPT4	-3.59211	0.00395726
MAMSTR	-3.59303	0.0037072
HOPX	-3.59332	0.00386174
BAG4	-3.59408	0.0045403
LYZL1	-3.59634	0.00180954
SAP18	-3.59943	0.00330396
LYNX1	-3.60145	0.000952894
FOXP2	-3.60275	0.00450395
ZNF816	-3.60294	0.000785727
B3GALT5	-3.60343	0.00282064
C7orf25	-3.60352	0.00395726
RARA	-3.60506	0.00446787
YIPF3	-3.60804	0.004958
PROB1	-3.60863	0.00330396
LEPRE1	-3.60888	0.00316993
MPP3	-3.6105	0.00226379
N4BP3	-3.61165	0.00299063
BMS1	-3.61429	0.00465093
APLN	-3.61505	0.000793025
MT1G	-3.62008	0.00412124
DPH3	-3.62143	0.00386174
ADSL	-3.62156	0.00499765
UPB1	-3.62163	0.00244398
EVC2	-3.62174	0.0025713
TPH2	-3.62188	0.00484076
C9orf172	-3.62201	0.00395726
F12	-3.62238	0.00259311
ARID3C	-3.62394	0.00379923
OR13A1	-3.62465	0.00402213
WDR38	-3.62512	0.00330396
FLAD1	-3.62695	0.00402213
PIGQ	-3.62753	0.00190621
THY1	-3.62815	0.00429138
GALT	-3.62931	0.00316993
HIF3A	-3.62954	0.00309192
ELP6	-3.62956	0.00344313
CRYL1	-3.62982	0.00322294
ST6GAL1	-3.63024	0.00316993
ZBED2	-3.63089	0.00450395
OR8B4	-3.63224	0.00199037
ZNF7	-3.63241	0.00379923
CD200	-3.63481	0.00322294
CORO6	-3.63521	0.00254967
NYAP1	-3.63557	0.00168766
MYRF	-3.63558	0.00395726
CALR	-3.6361	0.00103418
SH3GL2	-3.63691	0.00446787
MRGPRX3	-3.64103	0.00465093
GALNT13	-3.64474	0.00206015
YEATS4	-3.64501	0.00461378
PAQR7	-3.64514	0.00230274
AARD	-3.64551	0.00376832
TSPAN17	-3.64552	0.00499765
LRRC29	-3.6477	0.00282064
UNC5CL	-3.65091	0.00350029
MAP3K6	-3.6516	0.00379923
ATP11C	-3.65183	0.00299063
ACOT1	-3.65363	0.00367697
DHRS7B	-3.65406	0.00311773
CCR2	-3.65406	0.00446787
OR10H4	-3.65559	0.00284437
TNFRSF21	-3.65762	0.00491864
SPATA25	-3.65894	0.00358764
C15orf65	-3.65895	0.00122733
SIRPB2	-3.65928	0.00322294
TM2D3	-3.65932	0.00422258
MEST	-3.66223	0.00358764
MDM4	-3.66642	0.00373765
NUTM2F	-3.66674	0.00112186
PDE9A	-3.66977	0.00184125
PHKA2	-3.67063	0.00338683
NDUFV3	-3.67187	0.0034716
KARS	-3.67519	0.00301566
VPS37C	-3.67693	0.00403303
PNMA1	-3.67748	0.00275053
NEIL2	-3.68134	0.00118408
SLC25A18	-3.6822	0.00301566
ZNF581	-3.68272	0.00322294
ITGB1BP2	-3.68343	0.00472604
SSU72	-3.68743	0.0045403
PDGFB	-3.6888	0.00244398
PIP4K2B	-3.68924	0.00338683
UBALD1	-3.68946	0.00402213
NINJ1	-3.69323	0.00379923
SMIM3	-3.69433	0.00350029
SLC25A14	-3.69488	0.00226379
HDC	-3.69524	0.00418855
ZNF214	-3.69544	0.00338683
SMIM1	-3.696	0.00197327
C9orf156	-3.69641	0.00491864
NDUFS7	-3.69643	0.00154597
MRGBP	-3.69725	0.00499765
ELMOD2	-3.6974	0.00450395
FAM134B	-3.69836	0.00299063
RASL11B	-3.69901	0.00358764
SNRPN	-3.69914	0.00333138
MAK16	-3.70137	0.00450395
FAM189A2	-3.70188	0.0037072
LGALS2	-3.7025	0.00275053
ENPP1	-3.70408	0.00450395
ASPHD1	-3.70446	0.0045403
CCDC50	-3.70507	0.00432616
PARVB	-3.70575	0.00232245
ZNF219	-3.7064	0.00306631
AMMECR1	-3.70791	0.00322294
NMRK2	-3.70901	0.00330396
LYN	-3.70905	0.00412124
ZNF234	-3.7092	0.00484076
ACKR3	-3.70952	0.00184125
GJB7	-3.70964	0.00358764
CBLN3	-3.70983	0.00418855
CDKAL1	-3.71033	0.00429138
OR2T27	-3.71504	0.00422258
FAM160A2	-3.7152	0.00306631
CARD14	-3.71716	0.00299063
FANCM	-3.71746	0.00272752
GGT6	-3.7186	0.00352919
TMEM260	-3.72002	0.00392518
LRRN3	-3.72016	0.00193947
PSKH2	-3.72181	0.00270469
RLN2	-3.72237	0.00330396
ACSM2A	-3.72385	0.00412124
SP5	-3.72389	0.00206015
YTHDF1	-3.72401	0.0034716
OR52E6	-3.72434	0.00402213
GAP43	-3.72573	0.00324974
TYR	-3.72643	0.00418855
DCAF5	-3.72689	0.00333138
ZCCHC3	-3.72725	0.00379923
SPTBN2	-3.72727	0.00330396
DKKL1	-3.72791	0.00324974
PIK3C2G	-3.72818	0.00484076
ASIC5	-3.72882	0.00289238
SLCO1A2	-3.7295	0.00386174
HIST2H3D	-3.73029	0.00367697
ABCA6	-3.73065	0.00322294
TMEM39A	-3.73186	0.00429138
CCDC174	-3.73247	0.00330396
NAIP	-3.73351	0.00173245
KCNJ2	-3.73475	0.00192278
TMTC4	-3.73508	0.00484076
SIGLEC11	-3.73576	0.0045403
ETV4	-3.73662	0.00402213
NKAIN4	-3.73669	0.00103418
LOC100129924	-3.73759	0.00379923
KCNU1	-3.73767	0.00316993
FAM122A	-3.73991	0.00418855
TYROBP	-3.73991	0.00220649
AIFM1	-3.74047	0.004764
INTS10	-3.74292	0.00358764
ANKEF1	-3.74311	0.0023825
ZNF185	-3.74558	0.00244398
COX4I2	-3.74707	0.00272752
CEP57	-3.74777	0.00192278
SPG11	-3.7485	0.00379923
HOOK3	-3.75019	0.00386174
ABHD14B	-3.75037	0.00395726
TMEM171	-3.75062	0.00379923
MEF2A	-3.75134	0.00294113
CSGALNACT1	-3.75282	0.00379923
BAK1	-3.75331	0.00350029
OR10G2	-3.75933	0.00299063
C22orf39	-3.76056	0.00392518
FN3K	-3.76097	0.00275053
C5orf46	-3.761	0.00135389
IQGAP1	-3.76102	0.0011735
EXOSC4	-3.76458	0.00358764
PRDM4	-3.76523	0.00254967
RNF224	-3.76579	0.00289238
ALG1	-3.76583	0.0010919
RPP38	-3.76759	0.00352919
MAFB	-3.7703	0.00338683
FEM1B	-3.77137	0.00418855
MYH3	-3.77138	0.00392518
DEFB112	-3.77167	0.00153242
MAP3K9	-3.77231	0.00177833
DCBLD2	-3.77272	0.00311773
COMMD10	-3.77528	0.00446787
GUCY2C	-3.77539	0.00367697
PLSCR5	-3.77553	0.00254967
RASAL3	-3.77669	0.00244398
ARFRP1	-3.77699	0.00412124
ARG2	-3.77716	0.00289238
GIMAP4	-3.77786	0.00379923
STRIP2	-3.77936	0.00128343
GOLGA5	-3.78028	0.00402213
GABARAP	-3.78035	0.00387225
C3orf70	-3.78162	0.0034716
ZDHHC2	-3.78224	0.0025713
ZNF449	-3.78288	0.0010436
PIK3CG	-3.78403	0.00301566
CACUL1	-3.78451	0.00306631
PTPRF	-3.78455	0.00272752
KAT6A	-3.78969	0.00412124
SLC38A10	-3.79064	0.00130653
EIF4ENIF1	-3.79091	0.00484076
PABPN1L	-3.79113	0.000785727
TXNRD3NB	-3.79151	0.00412124
BEND3	-3.79472	0.00306631
HDAC6	-3.7954	0.00272752
PAK7	-3.79876	0.00446787
NCAPD3	-3.80007	0.00341488
IL2RA	-3.80048	0.00272752
OR5AU1	-3.80102	0.00468835
SLC7A11	-3.80433	0.00405492
CCL26	-3.80732	0.000771318
LARS	-3.80761	0.00338683
DDX46	-3.80785	0.00418855
FBXO4	-3.80794	0.0037072
CTTNBP2	-3.81215	0.00176292
NXPH3	-3.81386	0.00379923
CARS	-3.81416	0.00358764
GLRX3	-3.81511	0.00485367
TMEM134	-3.81528	0.00472604
HMOX2	-3.81533	0.00344313
C16orf13	-3.81735	0.00226379
TTC21B	-3.81829	0.00350029
NCAN	-3.81896	0.00322294
OR13C5	-3.82104	0.00322294
A3GALT2	-3.82142	0.00350029
DDX39B	-3.82303	0.00412124
IL2	-3.82366	0.00244398
CXorf65	-3.8241	0.00316993
DUOX2	-3.82449	0.00301566
EVA1A	-3.82499	0.0034716
ZNF827	-3.82499	0.00352919
SNX13	-3.82589	0.00294113
SLC7A8	-3.82687	0.00330396
TRIM39	-3.82755	0.00316993
SLC27A4	-3.82888	0.00373765
TXNDC11	-3.82987	0.00311773
PRAMEF4	-3.83589	0.00182533
SLC39A5	-3.83646	0.00301566
OSTN	-3.83822	0.00182533
UNC13A	-3.83936	0.00468835
MRM1	-3.84455	0.00275053
ALOXE3	-3.84502	0.00472604
MPP6	-3.84509	0.0015734
SPINK6	-3.8463	0.00299063
SEPHS1	-3.84643	0.003359
SNRPB	-3.84746	0.00311773
GOLT1A	-3.84805	0.0034716
ACOT13	-3.84904	0.00373765
RPS18	-3.84953	0.00333138
ZNF174	-3.85348	0.00392518
EBF1	-3.8541	0.00314373
CHD8	-3.85543	0.00316993
MRPS17	-3.85749	0.000535073
ZDHHC22	-3.85813	0.00184125
APOBEC3A	-3.85948	0.00103418
CLTCL1	-3.8608	0.0035583
OR1L1	-3.86086	0.00367697
RFFL	-3.86133	0.00289238
COQ10B	-3.86225	0.00133002
ALKBH8	-3.86468	0.00167297
SCARA5	-3.86633	0.00286828
PLEKHH1	-3.86668	0.00333138
FAM160B2	-3.87109	0.00468835
CMTM8	-3.87111	0.00450395
CD200R1	-3.87279	0.0025069
HMBS	-3.87351	0.00392518
SFRP2	-3.87555	0.00184125
PRKD3	-3.87564	0.00432616
NLGN1	-3.87627	0.0034716
TMEM14E	-3.87906	0.00450395
HSPA4	-3.87936	0.00499765
GRID1	-3.88011	0.000910338
ASCL5	-3.88135	0.00133002
DAGLA	-3.88207	0.00322294
GAD2	-3.88567	0.00398957
LCN6	-3.88653	0.00350029
FKBP9	-3.88742	0.00289238
PIP5K1C	-3.88854	0.00422258
BBC3	-3.88915	0.0035583
PDPN	-3.88984	0.00425685
TEX261	-3.89033	0.00484076
TYMP	-3.89057	0.00272752
HNF1A	-3.89359	0.00314373
XPO7	-3.89564	0.00115258
NIPA2	-3.89609	0.00402213
CD58	-3.89611	0.00197327
TRAM1	-3.89643	0.00168766
MACF1	-3.8967	0.000822852
PLAUR	-3.8993	0.00277372
ZFP37	-3.8998	0.00294113
FAM154B	-3.89992	0.00350029
CTSS	-3.90001	0.00282064
UROS	-3.90209	0.00330396
STARD10	-3.90438	0.00199037
ZNF517	-3.90641	0.00324974
DPYSL3	-3.90722	0.00350029
PRKCZ	-3.90868	0.000664591
EAPP	-3.91018	0.00294113
SENP1	-3.91032	0.00106267
CXorf22	-3.91035	0.00429138
ASNSD1	-3.91116	0.00358764
KLHL25	-3.91152	0.00192278
PERP	-3.91292	0.00289238
VTN	-3.91296	0.0016584
MYO10	-3.91315	0.00386174
ACTN1	-3.91341	0.00350029
SLC27A1	-3.91394	0.00304089
C11orf21	-3.91473	0.00418855
PPL	-3.91534	0.0045403
DCTD	-3.91766	0.00184125
IL22RA2	-3.91973	0.00209587
C6orf1	-3.91985	0.00446787
ACTBL2	-3.92367	0.00048184
DTX2	-3.92418	0.00248576
FAM114A2	-3.92681	0.00367697
CALY	-3.92795	0.0007228
HARBI1	-3.92807	0.00352919
KPNA7	-3.9282	0.00197327
ABRACL	-3.93179	0.00468835
S100A9	-3.93367	0.00311773
BRIX1	-3.93371	0.00272752
FOXE1	-3.93506	0.00379923
MYB	-3.93683	0.00405492
DCAF4L1	-3.93867	0.00333138
COPS7A	-3.94039	0.00197327
IRX2	-3.94092	0.000785727
ANKRD33B	-3.94236	0.00063417
CPLX4	-3.94521	0.00450395
DLC1	-3.94756	0.00379923
ZGLP1	-3.94822	0.00484076
UPK3B	-3.94912	0.00265954
TSC22D2	-3.95158	0.00272752
TECTB	-3.95221	0.00352919
KLRC2	-3.95469	0.00472604
NOL4	-3.95469	0.0045403
TIGD7	-3.95496	0.00311773
ITGAX	-3.95581	0.00080781
GCG	-3.95633	0.00432616
FHL1	-3.95913	0.0023825
SHKBP1	-3.96228	0.000853718
SLC2A6	-3.96528	0.00121638
TGM6	-3.96582	0.00187347
NTNG2	-3.96614	0.00311773
CKS1B	-3.96628	0.00491864
VSIG8	-3.96698	0.00450395
ZC3H10	-3.96835	0.0034716
MAPK8IP1	-3.96991	0.000822852
PSMB3	-3.97095	0.00386174
BMP1	-3.97271	0.0025282
LCOR	-3.97281	0.00279709
ATP7A	-3.97345	0.00465093
C9orf114	-3.97354	0.00412124
FAM177A1	-3.97503	0.00358764
DBF4B	-3.97596	0.00279709
MED30	-3.97746	0.00376832
AKT1	-3.97754	0.00190621
SCAI	-3.9776	0.00162961
ADCY5	-3.97776	0.00352919
OR10R2	-3.98013	0.0034716
PLSCR2	-3.9814	0.00405492
OR2H2	-3.98221	0.00412124
SUPT20HL2	-3.98225	0.00197327
CDH26	-3.98548	0.00136597
OR10A5	-3.98708	0.00330396
KRTAP17-1	-3.9887	0.00316993
PSENEN	-3.99012	0.00499765
PRMT7	-3.99021	0.00306631
CEBPE	-3.99231	0.00472604
ARID4B	-3.99466	0.00282064
KRTAP10-7	-3.99591	0.00322294
ASH2L	-3.99592	0.00350029
ZNF268	-3.99619	0.00379923
MPPED2	-3.99661	0.00484076
IFT27	-3.99723	0.00405492
TAS1R1	-3.99732	0.00472604
TUBD1	-3.99734	0.0034716
RFC5	-3.99796	0.00379923
MCF2L	-3.99853	0.00358764
OR51A2	-3.99874	0.00311773
FAM9C	-3.99928	0.00432616
ZBP1	-3.99941	0.00450395
FGFR3	-3.99979	0.00322294
TUBGCP2	-4.00243	0.00299063
CMPK2	-4.00263	0.00289238
RASL10A	-4.00274	0.00398957
PGAP3	-4.00298	0.00226379
MID1IP1	-4.00302	0.00244398
TUBB	-4.0042	0.00412124
LSM11	-4.00459	0.0017174
MC1R	-4.0064	0.00261508
NWD1	-4.007	0.00344313
LIPM	-4.0072	0.00301566
ZCCHC16	-4.01075	0.00468835
BPIFB2	-4.01106	0.00465093
C3orf18	-4.01152	0.00322294
CEP44	-4.01395	0.00418855
ZC3H14	-4.01483	0.00499765
MGMT	-4.01487	0.00284437
LPHN3	-4.01493	0.00322294
KATNB1	-4.01564	0.00299063
TMEM150B	-4.01647	0.00311773
ZNF670	-4.01729	0.00294113
IRX5	-4.02031	0.000944238
TAS2R14	-4.02202	0.00316993
ZC3H4	-4.02256	0.00277372
EXOC8	-4.02312	0.00379923
LIPJ	-4.02339	0.00465093
TBC1D4	-4.02481	0.00499765
PGM1	-4.02494	0.00187347
CHCHD5	-4.02845	0.00309192
MRGPRD	-4.02902	0.00150565
DUSP9	-4.0293	0.00244398
MANEAL	-4.02949	0.00272752
ASB7	-4.03145	0.00306631
BPIFA1	-4.03207	0.00299063
NOS2	-4.03218	0.00367697
ARMCX3	-4.03383	0.0034716
ZIK1	-4.03544	0.00289238
PDCD2L	-4.03624	0.00316993
UXT	-4.03658	0.00402213
GPR107	-4.03747	0.00301566
OCIAD2	-4.03946	0.00299063
C14orf177	-4.0396	0.00294113
KPRP	-4.04169	0.00472604
KCNJ14	-4.04209	0.00386174
HS3ST2	-4.04301	0.00301566
TACC1	-4.04312	0.00350029
PLA2G12B	-4.0439	0.00491864
SCARB2	-4.0441	0.00294113
NAGA	-4.04449	0.00263722
SUSD3	-4.04508	0.00432616
POLR3D	-4.04573	0.000927144
RS1	-4.04603	0.00379923
STRADA	-4.04606	0.00352919
C1QTNF8	-4.04655	0.00314373
MBD3L1	-4.04793	0.00468835
PIGR	-4.04979	0.00330396
WBP2NL	-4.05221	0.00450395
TMCC1	-4.05278	0.00272752
BPIFB1	-4.05496	0.00226379
BNC1	-4.05626	0.00261508
KCNG4	-4.0569	0.00412124
SMLR1	-4.05725	0.00433782
RRP9	-4.05973	0.004958
NUTM2G	-4.05995	0.00216904
CDK8	-4.06008	0.00220649
SERPINF1	-4.06296	0.00412124
CEACAM7	-4.06339	0.00232245
PPM1J	-4.06441	0.00199037
FBXO21	-4.06629	0.00162961
MORN1	-4.06738	0.00322294
ZNHIT3	-4.06743	0.00446787
OR7G1	-4.06843	0.00379923
TCF12	-4.07077	0.00254967
CYSLTR1	-4.07238	0.00422258
OR52N2	-4.07329	0.00309192
CEP112	-4.0751	0.00379923
LOXHD1	-4.07972	0.00244398
OR8S1	-4.08268	0.000689901
FLNB	-4.08348	0.000845902
ALG8	-4.08352	0.00418855
SAV1	-4.08401	0.00450395
INTS9	-4.08443	0.00484076
SERPINB12	-4.0849	0.00316993
LSM14B	-4.08677	0.000785727
SH3BGRL3	-4.08719	0.00311773
ARF3	-4.0872	0.00330396
DPH5	-4.08774	0.00333138
APOC4	-4.08991	0.00272752
TNFAIP6	-4.08993	0.00383037
TRAK2	-4.09021	0.00491864
BIN2	-4.09047	0.00379923
GRHL1	-4.09126	0.00379923
TYRO3	-4.09254	0.00398957
DCTN5	-4.09355	0.00468835
OR7E24	-4.09399	0.00450395
POLDIP2	-4.09642	0.00446787
LDHC	-4.09807	0.00301566
RPP30	-4.09849	0.00135389
MAB21L3	-4.09978	0.00450395
RIC8A	-4.10016	0.00270469
TERT	-4.10164	0.00133002
FGF2	-4.10339	0.00386174
LY9	-4.1036	0.00352919
MPEG1	-4.10429	0.00491864
LPPR3	-4.10574	0.000571755
BMF	-4.10604	0.00150565
KLF3	-4.10941	0.00330396
OR5H15	-4.10942	0.00418855
RBMS2	-4.11036	0.00324974
DLK1	-4.1117	0.000652263
TMEM88B	-4.11354	0.00272752
RAB3GAP1	-4.11384	0.00177833
TMCC3	-4.11674	0.00338683
KLF16	-4.1174	0.00395726
BLNK	-4.11853	0.00402213
CHTF8	-4.11856	0.00379923
COL1A2	-4.11963	0.00367697
SCML2	-4.11977	0.00344313
PRHOXNB	-4.1221	0.00118408
IFI27L2	-4.12216	0.00432616
GLRX	-4.12249	0.00168766
CPNE6	-4.12666	0.00367697
SAMD11	-4.12831	0.00254967
HIST3H3	-4.12881	0.00230274
MBLAC1	-4.12934	0.000902041
GATM	-4.12994	0.00289238
RIMBP3	-4.13055	0.00386174
MIP	-4.13241	0.0023825
SLC5A1	-4.13276	0.00450395
LRRTM2	-4.13669	0.00162961
PTPN14	-4.13719	0.00465093
DSTYK	-4.13736	0.00279709
TNFAIP3	-4.13738	0.00180954
OR6C1	-4.13836	0.00472604
CYC1	-4.13843	0.00115258
KANSL1L	-4.13859	0.00277372
PPP4R2	-4.13878	0.00244398
EXTL1	-4.13949	0.00358764
CACNA1I	-4.14051	0.00294113
GUCY1A2	-4.14072	0.00330396
TDRD7	-4.14115	0.00289238
ZNF32	-4.14327	0.00299063
ABRA	-4.14387	0.00379923
C2orf42	-4.14409	0.00294113
TXLNG	-4.14719	0.00311773
RPP21	-4.14834	0.00330396
EDC3	-4.14858	0.00294113
TMEM220	-4.1487	0.00322294
DVL1	-4.14954	0.00491864
TRIM16	-4.15552	0.003359
LDLRAD2	-4.15823	0.00168766
KIAA0947	-4.15903	0.00358764
PPM1H	-4.16222	0.0014663
BAAT	-4.16371	0.00213217
ALDH8A1	-4.16449	0.00386174
CD55	-4.16467	0.00193947
HES1	-4.16564	0.00386174
C12orf75	-4.16835	0.00491864
PIGH	-4.16853	0.00261508
LFNG	-4.16866	0.00301566
TMEM217	-4.16997	0.00450395
TSEN34	-4.17115	0.0037072
SLC36A3	-4.17168	0.00316993
TMEM74B	-4.17192	0.00324974
UBQLN4	-4.17243	0.00299063
EP300	-4.17277	0.00491864
RTL1	-4.17342	0.00327675
TTC16	-4.17355	0.0025713
CDC25A	-4.17558	0.00395726
BARX2	-4.17813	0.00484076
BST2	-4.17913	0.00301566
OR2D2	-4.17916	0.00275053
OR1B1	-4.17975	0.00272752
LCLAT1	-4.18082	0.00367697
AMTN	-4.18254	0.00311773
NHLRC4	-4.18366	0.00299063
HTR4	-4.18383	0.00101558
TEX264	-4.18582	0.00259311
FAF2	-4.18847	0.00108207
ZNF462	-4.18879	0.00333138
CP	-4.18944	0.00418855
PSD	-4.19239	0.00322294
STK36	-4.19328	0.00299063
EFCAB13	-4.19693	0.00379923
AKAP13	-4.20091	0.00195631
MS4A8	-4.20114	0.00168766
MTRNR2L6	-4.20182	0.00289238
LEPROT	-4.20262	0.00338683
TMEM239	-4.20565	0.00230274
PARP14	-4.20699	0.00450395
ZFP28	-4.2079	0.00299063
CCDC135	-4.20905	0.00294113
ANAPC13	-4.21306	0.00316993
MYOM1	-4.21329	0.00402213
LOC100132146	-4.21409	0.00234231
TAAR6	-4.21482	0.00484076
TMEM233	-4.21555	0.00450395
ALKBH3	-4.21907	0.00301566
RNF34	-4.22001	0.00123836
ZFP57	-4.22046	0.00379923
LHFPL5	-4.22175	0.00294113
BCAN	-4.22458	0.00499765
NRP1	-4.22542	0.00272752
BABAM1	-4.2293	0.00309192
OR8K1	-4.23196	0.00386174
SLC6A9	-4.23327	0.00450395
SCD5	-4.23335	0.00418855
HP1BP3	-4.23351	0.00418855
INSL5	-4.23368	0.00176292
TNFRSF10C	-4.23391	0.00282064
UBE2U	-4.23403	0.0025713
OR8D4	-4.23543	0.00398957
THNSL2	-4.23743	0.00176292
ETS2	-4.23884	0.00311773
VWA5A	-4.23925	0.000736364
S1PR1	-4.24056	0.00395726
TSC22D3	-4.24468	0.00301566
KCNJ16	-4.24499	0.00289238
CHD4	-4.24754	0.00118408
NRK	-4.24783	0.00275053
ELAVL2	-4.25017	0.00412124
hsa-mir-139	-4.25075	0.00357592
GTPBP10	-4.2518	0.00432616
MET	-4.25383	0.00215053
KRTAP4-12	-4.25453	0.0023825
RFX4	-4.25612	0.000401379
GYG1	-4.25669	0.00226379
OPN1LW	-4.25932	0.00402213
CXorf40A	-4.25996	0.00193947
RBM17	-4.26259	0.00330396
CST11	-4.26308	0.00301566
DNAH11	-4.2667	0.00130653
C12orf79	-4.27012	0.0034716
AP3S2	-4.27105	0.00392518
MLLT3	-4.27299	0.00465093
HIPK1	-4.27483	0.00206015
ZBTB32	-4.27628	0.00272752
IQSEC2	-4.27774	0.00209587
MPDU1	-4.27964	0.0014406
CWH43	-4.2815	0.00301566
EIF1B	-4.2831	0.00425685
EGFL7	-4.28383	0.00154597
BPIFB6	-4.28515	0.00244398
METTL10	-4.28682	0.00450395
PRKCDBP	-4.28962	0.00468835
NLRP4	-4.29091	0.00316993
DMRTA2	-4.29231	0.00322294
CST1	-4.29269	0.00184125
PPT1	-4.29468	0.00301566
FGF4	-4.29563	0.00450395
SEMA5A	-4.30022	0.00338683
C1orf61	-4.30125	0.00333138
ADPRHL1	-4.30353	0.00333138
OSBP2	-4.30393	0.00333138
PLXNA3	-4.30438	0.00254967
SCUBE2	-4.31078	0.00450395
MS4A13	-4.31302	0.00277372
GPR173	-4.31793	0.00468835
NEDD4	-4.31866	0.00418855
TMCO6	-4.31995	0.00311773
KIF2B	-4.32476	0.00136597
GRB2	-4.32814	0.00135389
ASCL3	-4.32987	0.00322294
B4GALNT4	-4.33008	0.00168766
NUAK1	-4.33164	0.00322294
HSD3B2	-4.33528	0.00244398
ZNF607	-4.33612	0.00450395
SRCAP	-4.33963	0.00429138
CRYBA2	-4.34062	0.000952894
ZNF217	-4.34125	0.00192278
SQLE	-4.34395	0.00338683
CLDND2	-4.34651	0.00195631
S100A14	-4.34848	0.00115258
SMIM5	-4.34884	0.0016584
MLLT4	-4.34907	0.00386174
ALK	-4.35205	0.00450395
TXNRD3	-4.35265	0.00244398
CDYL2	-4.35351	0.000970428
EEF1E1	-4.35643	0.00450395
CCDC12	-4.35673	0.0014406
BMP10	-4.35688	0.00316993
C13orf35	-4.35755	0.00282064
OR9Q2	-4.35799	0.00270469
TREML2	-4.35958	0.00450395
ZNF81	-4.36577	0.00350029
ZNF281	-4.36696	0.00316993
SEPSECS	-4.36905	0.00324974
POR	-4.36915	0.000822852
TGOLN2	-4.36927	0.000845902
P2RY2	-4.37312	0.00450395
NEUROG1	-4.37492	0.00484076
PI3	-4.37654	0.00330396
POLR2G	-4.37799	0.0023825
FECH	-4.37866	0.00102484
ANKDD1A	-4.38003	0.00379923
LRIT1	-4.38404	0.0014663
AGO2	-4.38532	0.00167297
ABHD15	-4.38696	0.00450395
INO80C	-4.38862	0.00294113
HIST1H4G	-4.3924	0.00350029
TWIST2	-4.39259	0.0034716
RUNX1	-4.39314	0.00398957
PTDSS1	-4.39332	0.00330396
VPS51	-4.39431	0.00330396
HTR6	-4.39447	0.00322294
WDR25	-4.39447	0.0025713
FAM129B	-4.39881	0.000555756
MCHR1	-4.40139	0.00450395
ARHGEF10L	-4.40237	0.0023825
CCDC134	-4.40381	0.00275053
NANP	-4.40381	0.00499765
TOP2B	-4.40404	0.00402213
KCTD8	-4.40463	0.00216904
C8A	-4.40481	0.000853718
NLE1	-4.40689	0.0023825
ADAT1	-4.4082	0.00402213
FARP2	-4.40836	0.00044628
FDXACB1	-4.4088	0.00272752
VN1R4	-4.40976	0.00450395
LHFPL4	-4.41034	0.00386174
SERPINF2	-4.41251	0.00275053
ROMO1	-4.41271	0.00103418
FASTKD5	-4.41321	0.00142791
ATR	-4.41958	0.0037072
NKAIN2	-4.41982	0.0007228
TMPRSS5	-4.42118	0.00316993
SPATA6L	-4.4249	0.00402213
LRRC25	-4.42911	0.00413239
MYOT	-4.43501	0.00446787
FIS1	-4.43867	0.00330396
KCNK4	-4.4389	0.00299063
GTF3C4	-4.44314	0.00446787
HSPB1	-4.4468	0.00230274
RNASE8	-4.44722	0.00386174
FITM2	-4.4473	0.00270469
MX1	-4.44816	0.0025713
MTPAP	-4.45041	0.00314373
ADAMTSL1	-4.45195	0.000378706
APOA4	-4.45343	0.000346935
CD151	-4.45375	0.00379923
ZNF169	-4.4548	0.000616546
TADA1	-4.45509	0.000433589
NUTM2A	-4.45671	0.00364697
CDCA3	-4.45782	0.00358764
PTPRQ	-4.45826	0.00322294
TNFAIP8L1	-4.45832	0.00168766
CDRT1	-4.46	0.000952894
SLC5A9	-4.46085	0.00284437
KRIT1	-4.46154	0.00373765
CHERP	-4.46228	0.00226379
RNF152	-4.46547	0.00301566
GAB1	-4.46646	0.0045403
CSHL1	-4.46658	0.00275053
TRIM50	-4.46909	0.00119476
KIAA1804	-4.47056	0.00216904
CLPTM1	-4.47175	0.00358764
MRC2	-4.47225	0.00184125
GIT1	-4.47739	0.00480224
C1orf210	-4.47987	0.0037072
LAMA2	-4.48094	0.00418855
F9	-4.48358	0.00301566
ABCA12	-4.48609	0.00299063
C22orf42	-4.48804	0.00301566
WDR73	-4.48824	0.00379923
CPSF4L	-4.48917	0.00299063
TRMU	-4.49205	0.00103418
RBBP7	-4.49383	0.00446787
HPCAL4	-4.49768	0.00379923
MGAT4A	-4.50369	0.00402213
MYO16	-4.50563	0.00338683
GRIA3	-4.50621	0.00261508
TRMT10B	-4.50695	0.00206015
ESCO1	-4.51027	0.00301566
EMC6	-4.51197	0.00352919
DSPP	-4.51266	0.00450395
CXCR6	-4.51614	0.00341488
CPNE2	-4.51645	0.00333138
TUBB6	-4.51656	0.00316993
GSG1L	-4.5266	0.00162961
SRC	-4.52719	0.00299063
CYP7B1	-4.52729	0.00311773
CMC2	-4.52926	0.00160921
GDE1	-4.53436	0.00311773
ZNF302	-4.53555	0.00412124
CEP19	-4.5373	0.00425685
PLSCR1	-4.53972	0.00242332
MGAT3	-4.53978	0.00386174
SLC4A1	-4.54024	0.00451604
TPBGL	-4.54309	0.00322294
ADK	-4.54838	0.00309192
CSNK1G1	-4.54915	0.00484076
BCL9L	-4.54978	0.00395726
HYAL4	-4.54979	0.00135389
ZMYM6NB	-4.55182	0.00209587
YBX2	-4.55915	0.00450395
CST5	-4.56004	0.00322294
PRKCG	-4.56606	0.00484076
TRIM64	-4.56806	0.0045403
CHPF2	-4.56944	0.00422258
SCO2	-4.57115	0.00432616
SEMG1	-4.57386	0.00446787
MKX	-4.57422	0.00316993
FOS	-4.57474	0.00197327
TOR2A	-4.57709	0.00279709
SH3GLB2	-4.57896	0.00215053
NFAM1	-4.57994	0.00197327
FAM19A3	-4.58741	0.00491864
SLC39A3	-4.58949	0.00187347
ZNRD1	-4.59071	0.00358764
STAU2	-4.60018	0.000525003
GABRR1	-4.60033	0.00108207
TADA3	-4.60053	0.0045403
HNRNPH3	-4.60065	0.00432616
LAMP1	-4.60126	0.00311773
GRIK5	-4.60408	0.00294113
PRF1	-4.60481	0.00386174
NAT6	-4.60604	0.00133002
CLPS	-4.60671	0.00418855
SERPINC1	-4.60771	0.00386174
IGSF3	-4.60944	0.00358764
ZNF426	-4.60992	0.00311773
RANGAP1	-4.61287	0.00423397
hsa-mir-1258	-4.61502	0.00338868
CLCA1	-4.61615	0.00322294
BOLA3	-4.61646	0.000333632
LAPTM4B	-4.61753	0.00395726
CNTF	-4.61833	0.00468835
TANK	-4.62046	0.00277372
OR1L4	-4.62113	0.00177833
GDAP2	-4.6297	0.00465093
SIL1	-4.63059	0.003359
YTHDF3	-4.63573	0.00301566
TMPRSS4	-4.63636	0.00450395
JUP	-4.63647	0.00209587
APPL2	-4.63797	0.00499765
OS9	-4.63935	0.00184125
AP3B2	-4.64135	0.00299063
MVB12A	-4.64634	0.00226379
SEMA3G	-4.64803	0.000778491
MBTPS2	-4.64852	0.00244398
ACHE	-4.65009	0.0015734
STRN4	-4.6627	0.00432616
DCLRE1C	-4.66919	0.00499765
TBX10	-4.67373	0.00412124
ZXDC	-4.67701	0.00103418
CHAMP1	-4.67749	0.00130653
KCNS2	-4.68346	0.000893815
ANKRD13A	-4.68435	0.00484076
PNMAL2	-4.69267	0.00200761
NTF4	-4.69377	0.00275053
DRD1	-4.70083	0.000545323
MTMR7	-4.70237	0.00450395
OR2AT4	-4.70342	0.00164395
FRZB	-4.70735	0.0014406
RBM15B	-4.71096	0.00294113
TTPA	-4.71546	0.00450395
CTNNB1	-4.71643	0.00226379
CNGB3	-4.72188	0.00220649
C7orf65	-4.72224	0.00270469
ZSCAN29	-4.72724	0.00272752
HCRT	-4.72807	0.00440833
ZNF12	-4.72896	0.00174762
EIF4EBP3	-4.72904	0.00330396
ATF1	-4.7323	0.00405492
ETV7	-4.73506	0.00484076
HTATSF1	-4.73572	0.00270469
TAB2	-4.74106	0.00386174
YRDC	-4.76836	0.00499765
ELMO2	-4.7696	0.00344313
NUP62	-4.77654	0.0011735
MATN2	-4.777	0.00379923
hsa-mir-6759	-4.77722	0.00397895
MRPS6	-4.78357	0.00379923
PNLIPRP3	-4.80169	0.00200761
TUSC3	-4.80351	0.00187347
ACSL3	-4.80989	0.00275053
ZNF565	-4.81416	0.00322294
GRM1	-4.81906	0.00244398
TWF2	-4.8224	0.00311773
CRYBB2	-4.82245	0.00472604
CIAPIN1	-4.82302	0.00322294
TTBK2	-4.82336	0.00261508
SFRP1	-4.82538	0.00275053
OR6B1	-4.82981	0.00330396
TSC1	-4.8354	0.000367825
LONP1	-4.83602	0.00284437
EPGN	-4.84099	0.00330396
ANKRD22	-4.84327	0.00301566
NANOS2	-4.84658	0.000670836
PTPN7	-4.85361	0.00137816
PTPN23	-4.85815	0.00472604
CFTR	-4.86163	0.003359
ELK4	-4.86232	0.00226379
GBP3	-4.86259	0.00275053
CDKL3	-4.86482	0.00350029
DRD4	-4.86492	0.00190621
MSR1	-4.87767	0.00379923
GLUL	-4.87837	0.00182533
GCK	-4.87854	0.000778491
OR6P1	-4.88296	0.00275053
MYO1D	-4.88313	0.0010436
INPPL1	-4.89656	0.00322294
KRTAP22-1	-4.89829	0.00432616
ARHGAP27	-4.9033	0.000961624
PIRT	-4.91005	0.00272752
CIAO1	-4.91984	0.003359
NCLN	-4.92126	0.00402213
MARS2	-4.92969	0.000652263
CDNF	-4.93222	0.00316993
TDRD12	-4.93298	0.00260041
GAS8	-4.93694	0.00154597
POLE	-4.97409	0.00350029
PUM1	-4.97787	0.00301566
POT1	-5.00133	0.00140283
FGF23	-5.01934	0.00367697
SLC35A4	-5.03574	0.0015734
ISYNA1	-5.04117	0.00282064
RPL19	-5.04509	0.00386174
CLEC4D	-5.05197	0.00265954
FUCA2	-5.05587	0.00333138
RFX2	-5.0602	0.000785727
GRPR	-5.06423	0.0010436
PRSS54	-5.08624	0.000853718
SPARCL1	-5.09266	0.00265954
SNRPA1	-5.09689	0.00373765
BRF1	-5.10886	0.00352919
TAS2R8	-5.12332	0.00322294
INO80D	-5.12395	0.0014663
ARMCX5-GPRASP2	-5.12991	0.000961624
UACA	-5.132	0.00358764
PIH1D3	-5.14017	0.00358764
USP27X	-5.14089	0.00499765
FKBP5	-5.14589	0.00206015
AP2M1	-5.1473	0.00468835
OR2G2	-5.14812	0.00299063
KDELR3	-5.15332	0.0025713
C19orf43	-5.17446	0.00137816
POLD1	-5.17628	0.00367697
NPHS2	-5.18655	0.00136597
RRP7A	-5.1888	0.000822852
NASP	-5.1906	0.00284437
IHH	-5.19276	0.00412124
TTC39B	-5.20666	0.00472604
GPCPD1	-5.23284	0.00425685
PEAR1	-5.23724	0.00472604
GPR3	-5.2512	0.00275053
PA2G4	-5.28479	0.00491864
CHDC2	-5.29133	0.00350029
RASL12	-5.2954	0.00206015
MATK	-5.29857	0.00324974
PRMT1	-5.30859	0.000367825
LAMB2	-5.31492	0.00367697
KRT76	-5.35401	0.000778491
ABHD16A	-5.3552	0.00398957
MBD2	-5.37169	0.00320518
ISM2	-5.37819	0.000109653
NUP214	-5.39341	0.00309192
ODC1	-5.42246	0.00314373
TRIML2	-5.44834	0.00190621
SCLY	-5.45063	0.00240965
CACNA1B	-5.48331	0.00168766
ACAD11	-5.48755	0.00115258
CEBPZ	-5.51174	0.00220649
RAI1	-5.51225	0.00044628
KTI12	-5.51648	0.00101558
CERS4	-5.53643	0.0023825
PNP	-5.53802	0.00176292
IFNG	-5.57802	0.00299063
RNF6	-5.87952	0.000709469
