# Supplementary material for: APLN, a novel prognostic biomarker, contributes to esophageal carcinoma development
Source: Research Square preprint supplement (doi:10.21203/rs.3.rs-7592740/v1), 2025-09-25
Supplement: Supplementary file 3 [file ced0450b174088a3e80db2f8.xlsx]

## Sheet: Sheet 1
id	statistic	hr	pvalue	gene_name
ENSG00000212127.6	3.94537	1.64401	0.0484687	TAS2R14
ENSG00000146066.3	3.89339	1.64419	0.0494686	HIGD2A
ENSG00000168824.14	3.92845	1.64509	0.0494635	NSG1
ENSG00000131871.15	3.9531	1.64802	0.0493396	SELENOS
ENSG00000168131.4	4.02713	1.65158	0.046711	OR2B2
ENSG00000163463.13	3.95582	1.65247	0.0498482	KRTCAP2
ENSG00000107593.17	3.97578	1.6529	0.0487443	PKD2L1
ENSG00000106004.5	4.01693	1.6551	0.0464928	HOXA5
ENSG00000134056.12	3.97421	1.6556	0.0472069	MRPS36
ENSG00000256950.2	4.00112	1.65561	0.0469226	AC069503.2
ENSG00000132823.11	3.8822	1.65572	0.0499584	OSER1
ENSG00000033627.17	4.0008	1.65588	0.0480747	ATP6V0A1
ENSG00000136630.13	4.04379	1.65623	0.0462525	HLX
ENSG00000110245.12	4.05789	1.65632	0.0464731	APOC3
ENSG00000167210.17	4.03392	1.65662	0.0471199	LOXHD1
ENSG00000140830.9	4.07257	1.65738	0.0444136	TXNL4B
ENSG00000158516.12	3.86751	1.65761	0.0488217	CPA2
ENSG00000106686.16	4.08728	1.65792	0.0451044	SPATA6L
ENSG00000079950.14	4.00145	1.65865	0.0492251	STX7
ENSG00000173221.14	4.06765	1.65906	0.0456916	GLRX
ENSG00000162927.14	4.01168	1.65936	0.0450357	PUS10
ENSG00000111237.19	4.03302	1.66021	0.0460796	VPS29
ENSG00000162972.10	4.07429	1.66178	0.0455186	MAIP1
ENSG00000285991.1	4.05201	1.6622	0.0472725	AL355312.5
ENSG00000105398.4	4.1431	1.66264	0.0431277	SULT2A1
ENSG00000274290.3	4.09186	1.66332	0.0456101	H2BC6
ENSG00000249709.8	4.12482	1.66494	0.0441919	ZNF564
ENSG00000175877.4	4.15607	1.66542	0.0428492	TMEM270
ENSG00000186205.13	4.13986	1.66566	0.0443143	MTARC1
ENSG00000262919.8	3.92192	1.66568	0.0482747	CCNQ
ENSG00000063177.13	4.14022	1.66571	0.0437832	RPL18
ENSG00000167083.7	4.12882	1.66594	0.0435006	GNGT2
ENSG00000184307.16	4.00491	1.66616	0.0497336	ZDHHC23
ENSG00000125835.19	4.09237	1.66681	0.0429081	SNRPB
ENSG00000131507.11	4.08212	1.668	0.0436877	NDFIP1
ENSG00000168062.10	4.1655	1.66831	0.0436776	BATF2
ENSG00000275714.2	3.99902	1.66862	0.0465315	H3C1
ENSG00000253506.3	4.02445	1.66923	0.046182	NACA2
ENSG00000155959.12	4.17954	1.66983	0.0427836	VBP1
ENSG00000229833.10	4.10949	1.67009	0.0429843	PET100
ENSG00000110934.13	4.16548	1.67022	0.0431438	BIN2
ENSG00000277481.1	4.16355	1.67056	0.043231	PKD1L3
ENSG00000164283.13	4.23684	1.67423	0.0408458	ESM1
ENSG00000172795.17	4.18045	1.67448	0.0423476	DCP2
ENSG00000139687.16	4.00936	1.67557	0.0463902	RB1
ENSG00000139644.13	4.18417	1.67735	0.0437057	TMBIM6
ENSG00000130208.9	4.24452	1.67748	0.0406527	APOC1
ENSG00000198455.4	4.09435	1.68041	0.0473315	ZXDB
ENSG00000204952.3	4.28996	1.68138	0.0401538	FBXO47
ENSG00000156313.15	4.21098	1.68222	0.0431886	RPGR
ENSG00000231767.4	4.16582	1.68353	0.0427172	RPS27AP5
ENSG00000069482.7	4.33963	1.68594	0.0389605	GAL
ENSG00000144043.12	4.25242	1.68752	0.0421695	TEX261
ENSG00000079462.8	4.37179	1.69034	0.0378186	PAFAH1B3
ENSG00000072506.13	4.28411	1.69158	0.0394642	HSD17B10
ENSG00000125898.13	4.29035	1.69163	0.0389454	FAM110A
ENSG00000147872.10	4.40884	1.69329	0.0359852	PLIN2
ENSG00000101365.21	4.38281	1.69376	0.0360966	IDH3B
ENSG00000170128.5	4.39907	1.6952	0.0371693	GPR25
ENSG00000123131.13	4.37805	1.69667	0.039194	PRDX4
ENSG00000197061.5	4.40802	1.699	0.0385974	H4C3
ENSG00000125870.11	4.48211	1.705	0.035999	SNRPB2
ENSG00000001626.16	4.36226	1.70608	0.0406631	CFTR
ENSG00000253598.3	4.14899	1.70875	0.0467502	SLC10A5
ENSG00000232119.8	4.42231	1.7094	0.0371374	MCTS1
ENSG00000139610.2	4.55722	1.70966	0.0349568	CELA1
ENSG00000197279.4	4.53	1.71314	0.0365241	ZNF165
ENSG00000119042.17	4.66574	1.71801	0.0328341	SATB2
ENSG00000183150.8	4.47983	1.71979	0.035121	GPR19
ENSG00000115540.15	4.46417	1.72028	0.0352693	MOB4
ENSG00000184471.8	4.6166	1.72123	0.0335699	C1QTNF8
ENSG00000111711.10	4.5906	1.7221	0.0324416	GOLT1B
ENSG00000118946.12	4.61025	1.72242	0.0349115	PCDH17
ENSG00000170345.10	4.56636	1.72267	0.0363502	FOS
ENSG00000134897.14	4.69245	1.72387	0.0318983	BIVM
ENSG00000088876.13	4.63229	1.72457	0.0316987	ZNF343
ENSG00000035115.22	4.69284	1.72544	0.032349	SH3YL1
ENSG00000284952.1	4.53486	1.72556	0.0355371	AC104472.3
ENSG00000110442.12	4.72994	1.72586	0.0316762	COMMD9
ENSG00000100884.9	4.69895	1.72686	0.0327097	CPNE6
ENSG00000143278.5	4.68806	1.72814	0.0309816	F13B
ENSG00000173681.16	4.59713	1.7289	0.0350165	BCLAF3
ENSG00000182521.5	4.54312	1.72916	0.0349077	TBPL2
ENSG00000134748.13	4.55706	1.72934	0.0351115	PRPF38A
ENSG00000167286.10	4.77983	1.73134	0.030296	CD3D
ENSG00000081248.11	4.75505	1.7335	0.0299199	CACNA1S
ENSG00000129158.11	4.77454	1.73413	0.0309239	SERGEF
ENSG00000177324.14	4.81992	1.73442	0.0296227	BEND2
ENSG00000085224.23	4.74956	1.73491	0.0318626	ATRX
ENSG00000089091.16	4.79221	1.73672	0.0310973	DZANK1
ENSG00000127328.22	4.63582	1.74141	0.0354616	RAB3IP
ENSG00000166927.13	4.89574	1.74382	0.0283765	MS4A7
ENSG00000125962.14	4.75942	1.74412	0.0321921	ARMCX5
ENSG00000100591.8	4.66945	1.74436	0.031585	AHSA1
ENSG00000168566.13	4.84927	1.74452	0.0297206	SNRNP48
ENSG00000139180.11	4.72421	1.74509	0.0301933	NDUFA9
ENSG00000173825.7	4.93695	1.74572	0.0281622	TIGD3
ENSG00000150459.12	4.76903	1.74585	0.0300242	SAP18
ENSG00000183734.4	4.89762	1.74609	0.0288499	ASCL2
ENSG00000130119.17	4.91809	1.74715	0.0289451	GNL3L
ENSG00000162769.13	4.8879	1.75007	0.0294895	FLVCR1
ENSG00000119888.11	4.83863	1.75206	0.0312454	EPCAM
ENSG00000108639.8	4.96948	1.75327	0.0281299	SYNGR2
ENSG00000085871.9	4.91209	1.7539	0.0275074	MGST2
ENSG00000178449.9	4.96192	1.75541	0.026483	COX14
ENSG00000088888.18	5.06803	1.75577	0.0248857	MAVS
ENSG00000144583.5	5.02048	1.75633	0.026414	MARCHF4
ENSG00000273703.2	4.95032	1.75649	0.0266914	H2BC14
ENSG00000148483.9	5.0327	1.75764	0.0258499	TMEM236
ENSG00000187325.5	4.81876	1.75853	0.0298867	TAF9B
ENSG00000149600.12	5.08722	1.76017	0.025046	COMMD7
ENSG00000168038.11	4.73026	1.76045	0.0341752	ULK4
ENSG00000184831.14	4.87608	1.76101	0.0279567	APOO
ENSG00000038274.17	5.02138	1.76231	0.0260465	MAT2B
ENSG00000141505.12	5.09597	1.76238	0.024528	ASGR1
ENSG00000205155.8	4.9912	1.7662	0.0266683	PSENEN
ENSG00000138036.18	4.92931	1.76721	0.0287262	DYNC2LI1
ENSG00000168748.14	5.13482	1.76814	0.0256491	CA7
ENSG00000125885.13	5.1932	1.76987	0.0243959	MCM8
ENSG00000125826.21	5.12997	1.77076	0.0240923	RBCK1
ENSG00000198814.13	5.02183	1.77484	0.0282885	GK
ENSG00000168634.5	5.08942	1.77813	0.0260394	WFDC13
ENSG00000145741.16	5.00133	1.78113	0.0259737	BTF3
ENSG00000118939.18	5.12915	1.78159	0.0248261	UCHL3
ENSG00000179588.9	5.26206	1.78244	0.0239017	ZFPM1
ENSG00000139746.16	5.30567	1.78322	0.0221861	RBM26
ENSG00000187268.12	5.29258	1.78588	0.0235357	FAM9C
ENSG00000213471.10	5.3957	1.78967	0.0214103	TTLL13P
ENSG00000256060.3	5.2049	1.7901	0.0247724	TRAPPC2B
ENSG00000091879.14	5.29888	1.79069	0.0222784	ANGPT2
ENSG00000134256.12	5.19207	1.79094	0.0234917	CD101
ENSG00000101464.11	5.31854	1.7923	0.0213292	PIGU
ENSG00000131508.16	5.33233	1.79283	0.0214936	UBE2D2
ENSG00000196660.11	5.27414	1.79338	0.0235788	SLC30A10
ENSG00000173141.5	5.34729	1.79397	0.0224531	MRPL57
ENSG00000125498.20	5.49972	1.79949	0.0201791	KIR2DL1
ENSG00000257727.6	5.41095	1.80105	0.0224215	CNPY2
ENSG00000006837.12	5.43789	1.80192	0.0202119	CDKL3
ENSG00000180815.14	5.48214	1.80631	0.0212033	MAP3K15
ENSG00000284922.2	5.48627	1.80957	0.0198717	AP000812.4
ENSG00000140853.16	5.29973	1.81173	0.0226103	NLRC5
ENSG00000130368.7	5.43562	1.81295	0.0216432	MAS1
ENSG00000165891.16	5.49396	1.81365	0.019224	E2F7
ENSG00000196531.14	5.40359	1.8145	0.0210228	NACA
ENSG00000175820.4	5.40641	1.81978	0.0228787	CCDC168
ENSG00000165591.6	5.4646	1.82162	0.0213431	FAAH2
ENSG00000111196.10	5.395	1.82352	0.0207476	MAGOHB
ENSG00000137875.4	5.69426	1.82544	0.017418	BCL2L10
ENSG00000120675.6	5.79234	1.82703	0.0171379	DNAJC15
ENSG00000133112.17	5.51224	1.82762	0.0202439	TPT1
ENSG00000076826.10	5.65081	1.82896	0.0200917	CAMSAP3
ENSG00000101247.18	5.81544	1.83306	0.016597	NDUFAF5
ENSG00000102054.18	5.82857	1.84245	0.016883	RBBP7
ENSG00000185105.5	5.8658	1.84509	0.0175124	MYADML2
ENSG00000125351.12	5.80234	1.85397	0.0180908	UPF3B
ENSG00000169242.12	5.9427	1.85521	0.0151587	EFNA1
ENSG00000204604.12	5.78599	1.86444	0.0194665	ZNF468
ENSG00000165997.5	6.15807	1.87063	0.0146259	ARL5B
ENSG00000134248.14	6.01654	1.87514	0.015082	LAMTOR5
ENSG00000107954.10	6.12179	1.87551	0.0155859	NEURL1
ENSG00000160888.7	6.22071	1.87762	0.0144534	IER2
ENSG00000125356.7	6.25268	1.88719	0.0131537	NDUFA1
ENSG00000241598.5	6.34774	1.89092	0.0132033	KRTAP5-4
ENSG00000158874.11	6.40671	1.89108	0.0127672	APOA2
ENSG00000185825.17	6.34544	1.89148	0.0121019	BCAP31
ENSG00000266826.2	6.37768	1.8917	0.013282	IGBP1P2
ENSG00000182584.6	6.22386	1.89352	0.0151186	ACTL10
ENSG00000157103.12	6.19736	1.89885	0.0129639	SLC6A1
ENSG00000171388.12	6.44764	1.90065	0.0119097	APLN
ENSG00000165195.16	6.38739	1.90148	0.0132435	PIGA
ENSG00000117984.15	6.54408	1.90437	0.0110359	CTSD
ENSG00000226979.9	6.53473	1.90449	0.0116293	LTA
ENSG00000196748.10	6.58246	1.906	0.0116039	CLPSL2
ENSG00000085231.14	6.7332	1.92728	0.0109747	AK6
ENSG00000067829.19	6.61436	1.92927	0.0113553	IDH3G
ENSG00000162174.12	6.60219	1.9459	0.0126766	ASRGL1
ENSG00000172943.20	6.79277	1.94709	0.0103257	PHF8
ENSG00000189190.10	6.80873	1.94779	0.0108508	ZNF600
ENSG00000143543.15	6.88779	1.9504	0.0104019	JTB
ENSG00000178021.11	6.96777	1.95646	0.00937828	TSPYL6
ENSG00000164284.15	7.10723	1.96684	0.00924522	GRPEL2
ENSG00000140527.15	7.0808	1.96753	0.00938182	WDR93
ENSG00000174469.23	7.05701	1.96988	0.00887464	CNTNAP2
ENSG00000147437.10	7.26471	1.98879	0.00810257	GNRH1
ENSG00000173214.7	7.48297	1.99493	0.00695909	MFSD4B
ENSG00000135517.9	7.3228	1.99619	0.00745945	MIP
ENSG00000181061.14	7.6307	2.02416	0.00725448	HIGD1A
ENSG00000135083.16	7.737	2.02463	0.00644513	CCNJL
ENSG00000171450.6	7.89951	2.02818	0.00537381	CDK5R2
ENSG00000125812.16	7.85953	2.03814	0.00555114	GZF1
ENSG00000213337.9	8.09201	2.04668	0.00500957	ANKRD39
ENSG00000083828.16	8.38649	2.08538	0.00458969	ZNF586
ENSG00000232388.5	8.57715	2.09313	0.00400677	SMIM26
ENSG00000232112.3	8.42405	2.09992	0.00444508	TMA7
ENSG00000125895.5	8.80977	2.10804	0.00353305	TMEM74B
ENSG00000147614.4	8.52169	2.10879	0.00366565	ATP6V0D2
ENSG00000131174.7	8.54828	2.11061	0.00387296	COX7B
ENSG00000125901.6	8.73269	2.11302	0.00331748	MRPS26
ENSG00000171657.6	8.43149	2.12473	0.00380336	GPR82
ENSG00000102390.11	8.76183	2.12995	0.00346764	PBDC1
ENSG00000163499.12	8.85368	2.13274	0.00347058	CRYBA2
ENSG00000164919.11	8.51818	2.16567	0.00411235	COX6C
ENSG00000185404.17	9.28669	2.18979	0.00275698	SP140L
ENSG00000101470.10	10.1957	2.25004	0.00187755	TNNC2
ENSG00000005022.6	9.49572	2.2582	0.00231536	SLC25A5
ENSG00000146386.8	10.083	2.27299	0.00177599	ABRACL
ENSG00000119048.8	10.1386	2.27947	0.00158514	UBE2B
ENSG00000089289.16	10.3347	2.31984	0.0017656	IGBP1
ENSG00000198754.5	11.475	2.36016	0.000979143	OXCT2
ENSG00000171116.7	12.0256	2.42819	0.000837048	HSFX1
